# Supplementary material
Source: Royal Society of Chemistry journal article supplement (doi:10.1039/d6gc02544g)
Supplement: d6gc02544g1.pdf [file d6gc02544g1.pdf]

## Supporting Information

### **Fluorinated Covalent-Organic Framework-Based Quasi-Solid Electrolyte Enable Low-Temperature Lithium-ion Battery**

Xin Zhang,<sup>‡</sup> Honghong Yang,<sup>‡</sup> Chuanbao Jiao, Nan Zhang, Zhe Yang, Xiaomin Kang\* and  
Zhiliang Liu\*

*College of Chemistry and Chemical Engineering, Inner Mongolia University, Hohhot, 010021,  
PR China.*

E-mail: [kangxm@imu.edu.cn](mailto:kangxm@imu.edu.cn), [cezlliu@imu.edu.cn](mailto:cezlliu@imu.edu.cn)

<sup>‡</sup> These authors contributed equally to this work.

## Table of Contents

- 1.**Fig. S1.** Simulation model of COF-TA<sub>0.5</sub>TF<sub>0.5</sub> QSSE.
- 2.**Fig. S2.** PXRD patterns of COF-TA, COF-TF and COF-TA<sub>0.5</sub>TF<sub>0.5</sub> match well with that of simulated ones.
- 3.**Fig. S3.** FTIR spectra of COF-TA, COF-TF and COF-TA<sub>a</sub>TF<sub>b</sub> (a+b = 1, a = 0.75, 0.67, 0.50, 0.33, 0.25).
- 4.**Fig. S4.** The XPS fitting plot of COF-TA<sub>0.5</sub>TF<sub>0.5</sub> for N 1s.
- 5.**Fig. S5.** SEM images of COF-TA<sub>0.75</sub>TF<sub>0.25</sub>, COF-TA<sub>0.67</sub>TF<sub>0.33</sub>, COF-TA<sub>0.33</sub>TF<sub>0.67</sub> and COF-TA<sub>0.25</sub>TF<sub>0.75</sub>.
- 6.**Fig. S6.** SEM-EDX of COF-TA.
- 7.**Fig. S7.** SEM-EDX of (a) COF-TA<sub>0.75</sub>TF<sub>0.25</sub> and (b) COF-TA<sub>0.67</sub>TF<sub>0.33</sub>.
- 8.**Fig. S8.** SEM-EDX of (a) COF-TA<sub>0.33</sub>TF<sub>0.67</sub>, (b) COF-TA<sub>0.25</sub>TF<sub>0.75</sub> and (c) COF-TF.
- 9.**Fig. S9.** TEM images of COF-TA, COF-TF and COF-TA<sub>0.5</sub>TF<sub>0.5</sub>.
- 10.**Fig. S10.** Photographs of the COF-TA<sub>0.5</sub>TF<sub>0.5</sub> electrolyte membrane after being stored in an electric blast drying oven for 1 h at different temperatures: (a) 60 °C, (b) 100 °C, (c) 140 °C and (d) 180 °C.
- 11.**Fig. S11.** Optical photo of COF-TA<sub>0.5</sub>TF<sub>0.5</sub> quasi-solid-state electrolyte membrane.
- 12.**Fig. S12.** Typical Nyquist plots of the ss|QSSEs|ss cell at various temperatures from -50 °C to 110 °C (the internal is the magnified high frequency area) of (a) COF-TA, (b) COF-TF, (c) COF-TA<sub>0.75</sub>TF<sub>0.25</sub>, (d) COF-TA<sub>0.67</sub>TF<sub>0.33</sub>, (e) COF-TA<sub>0.33</sub>TF<sub>0.67</sub> and (f) COF-TA<sub>0.25</sub>TF<sub>0.75</sub>.
- 13.**Fig. S13.** Chronoamperometric curves and EIS curves of (a) COF-TA, (b) COF-TF, (c) COF-TA<sub>0.75</sub>TF<sub>0.25</sub>, (d) COF-TA<sub>0.67</sub>TF<sub>0.33</sub>, (e) COF-TA<sub>0.33</sub>TF<sub>0.67</sub> and (f) COF-TA<sub>0.25</sub>TF<sub>0.75</sub> electrolyte before and after polarization.
- 14.**Fig. S14.** The LSV curves of COF-TA<sub>0.75</sub>TF<sub>0.25</sub>, COF-TA<sub>0.67</sub>TF<sub>0.33</sub>, COF-TA<sub>0.33</sub>TF<sub>0.67</sub> and COF-TA<sub>0.25</sub>TF<sub>0.75</sub> electrolyte at room temperature.
- 15.**Fig. S15.** The comprehensive  $t_{Li^+}$  and LSV comparison of COF-TA<sub>a</sub>TF<sub>b</sub> (a+b = 1, a = 0.75, 0.67, 0.5, 0.33, 0.25) QSSE.
- 16.**Fig. S16.** Arrhenius plots of different QSSEs.
- 17.**Fig. S17.** Voltage profiles of the Li|COF-TA<sub>0.5</sub>TF<sub>0.5</sub>|Li symmetric cells with a current density of 0.5 mA cm<sup>-2</sup> at room temperature.
- 18.**Fig. S18.** SEM images of Li foil from Li symmetric cells with COF-TA, COF-TF and COF-TA<sub>0.5</sub>TF<sub>0.5</sub> after the lithium plating/stripping at the current density of 0.1 mA cm<sup>-2</sup>

and the capacity of 0.1 mAh cm<sup>-2</sup>, respectively.

**19.Fig. S19.** SEM images of Li foil from Li symmetric cells with COF-TA<sub>0.5</sub>TF<sub>0.5</sub> after the lithium plating/stripping at varying current densities, the capacities and temperatures.

**20.Fig.e S20.** XPS survey spectrum of COF-TA<sub>0.5</sub>TF<sub>0.5</sub>; the XPS fitting plot of COF-TA<sub>0.5</sub>TF<sub>0.5</sub> after the lithium plating/stripping at the current density of 0.2 mA cm<sup>-2</sup> and the capacity of 0.2 mAh cm<sup>-2</sup> for Li 1s and F 1s, respectively.

**21.Fig. S21.** Charge and discharge voltage profiles of COF-TA<sub>0.5</sub>TF<sub>0.5</sub> at different rates; Rate performance of QSSE with COF-TA<sub>0.5</sub>TF<sub>0.5</sub>.

**22.Fig. S22.** Photographs showing the bulb being lit by LFP|COF-TA<sub>0.5</sub>TF<sub>0.5</sub>|Li at room temperature and -40 °C.

**23.Fig. S23.** Calculated mean square displacement (MSD) of Li<sup>+</sup> in electrolytes as a function of the simulation time.

**24.Table S1.** ICP-OES results of COF-TA, COF-TA<sub>0.5</sub>TF<sub>0.5</sub> and COF-TF.

**25.Table S2.** The ionic conductivity summery of COF-TA, COF-TF, COF-TA<sub>0.75</sub>TF<sub>0.25</sub>, COF-TA<sub>0.67</sub>TF<sub>0.33</sub>, COF-TA<sub>0.5</sub>TF<sub>0.5</sub>, COF-TA<sub>0.33</sub>TF<sub>0.67</sub>, COF-TA<sub>0.25</sub>TF<sub>0.75</sub> at different temperatures.

**26.Table S3.** The Li<sup>+</sup> conductivity comparison between COF-TA<sub>0.5</sub>TF<sub>0.5</sub> and reported work previously in wide temperature range.

**27.Table S4.** The cycling performances comparison between COF-TA<sub>0.5</sub>TF<sub>0.5</sub> and other similar COF-based electrolytes reported previously.

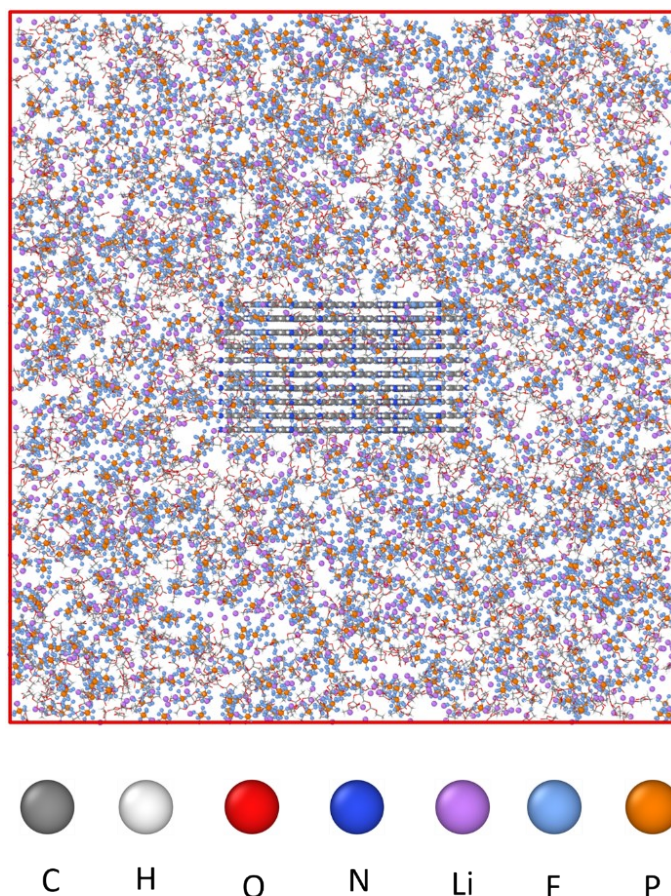

**Fig. S1.** Simulation model of COF-TA<sub>0.5</sub>TF<sub>0.5</sub> QSSE.

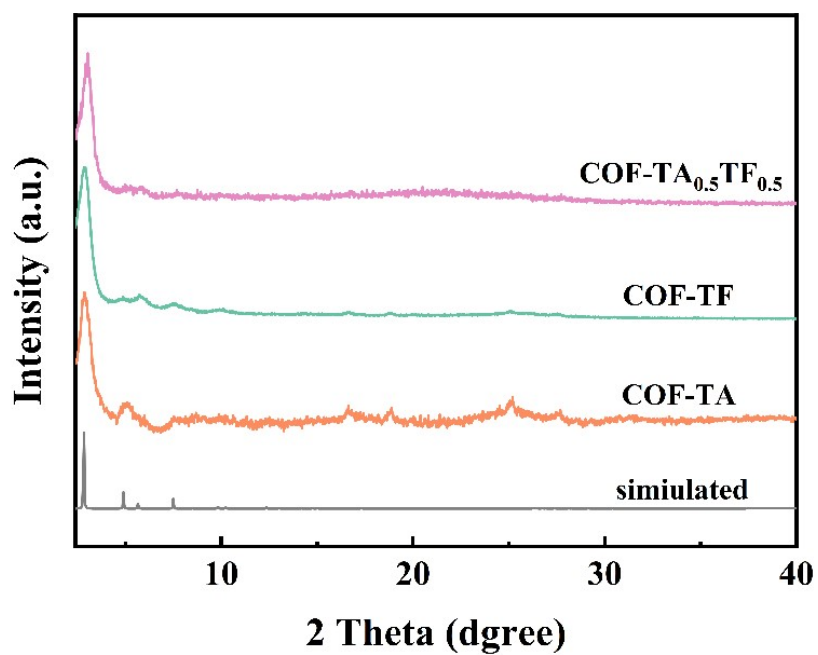

**Fig. S2.** PXRD patterns of COF-TA, COF-TF and COF-TA<sub>0.5</sub>TF<sub>0.5</sub> match well with that of simulated ones.

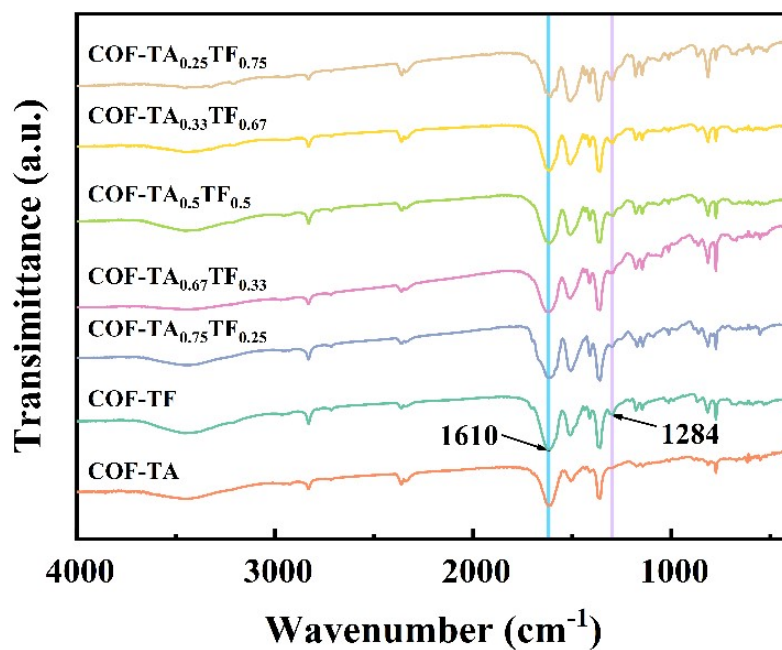

**Fig. S3.** FTIR spectra of COF-TA, COF-TF and COF-TA<sub>a</sub>TF<sub>b</sub> ( $a+b = 1$ ,  $a = 0.75, 0.67, 0.50, 0.33, 0.25$ ).

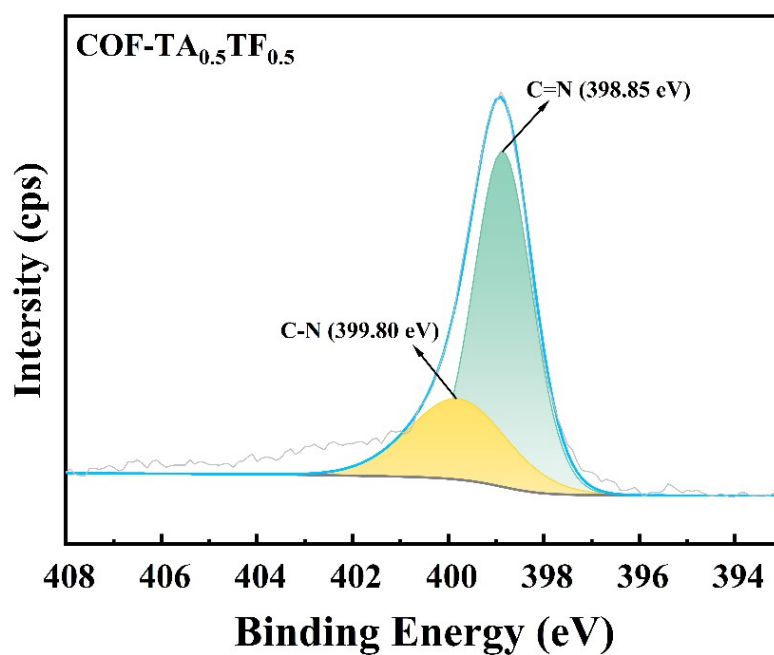

**Fig. S4.** The XPS fitting plot of COF-TA<sub>0.5</sub>TF<sub>0.5</sub> for N 1s.

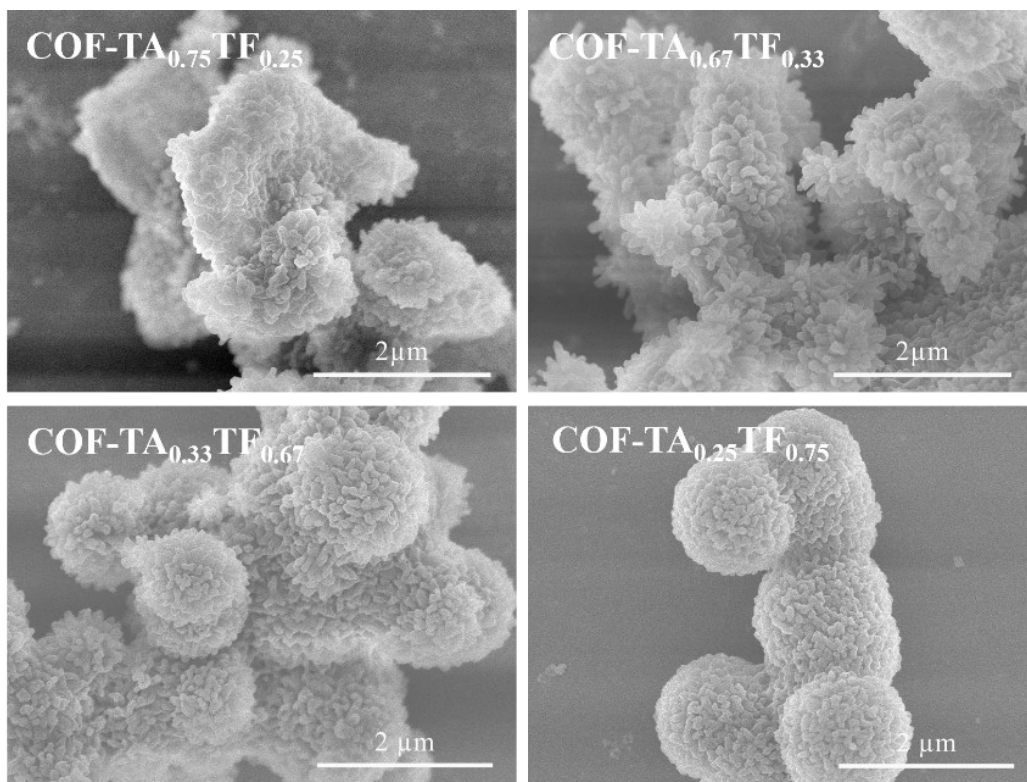

**Fig. S5.** SEM images of COF-TA<sub>0.75</sub>TF<sub>0.25</sub>, COF-TA<sub>0.67</sub>TF<sub>0.33</sub>, COF-TA<sub>0.33</sub>TF<sub>0.67</sub> and COF-TA<sub>0.25</sub>TF<sub>0.75</sub>.

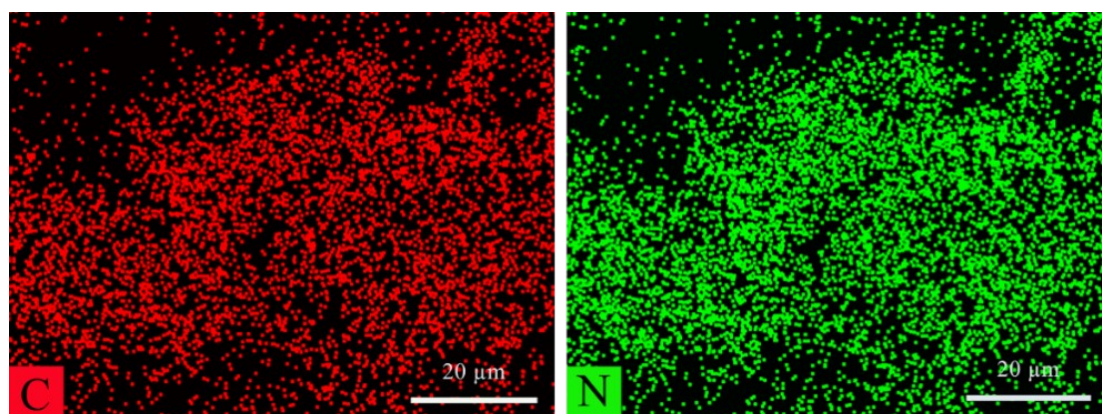

**Fig. S6.** SEM-EDX of COF-TA.

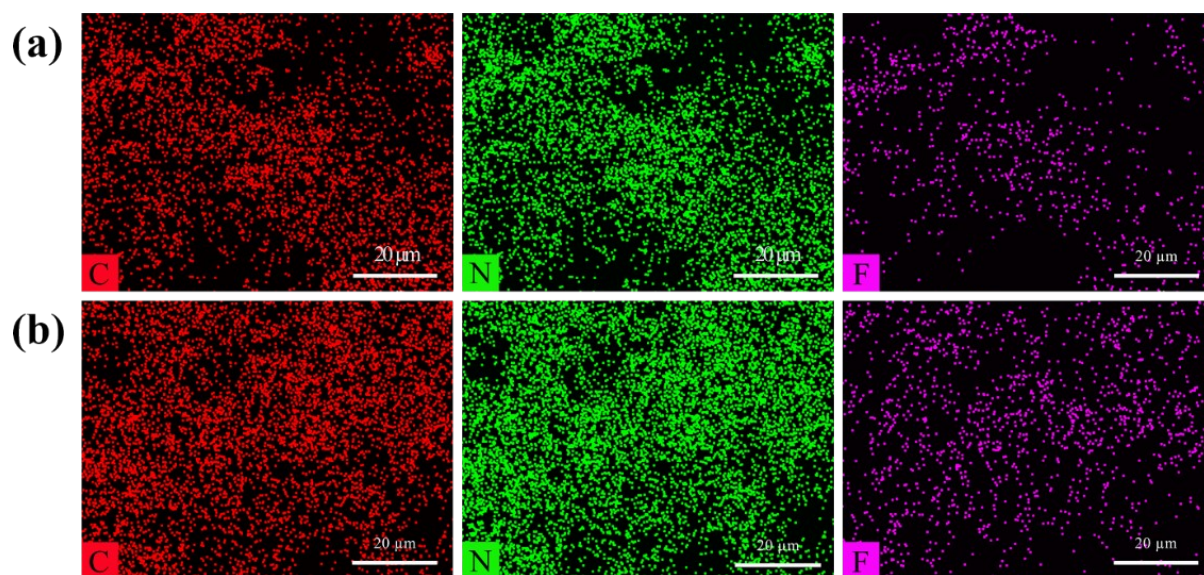

**Fig. S7.** SEM-EDX of (a) COF-TA<sub>0.75</sub>TF<sub>0.25</sub> and (b) COF-TA<sub>0.67</sub>TF<sub>0.33</sub>.

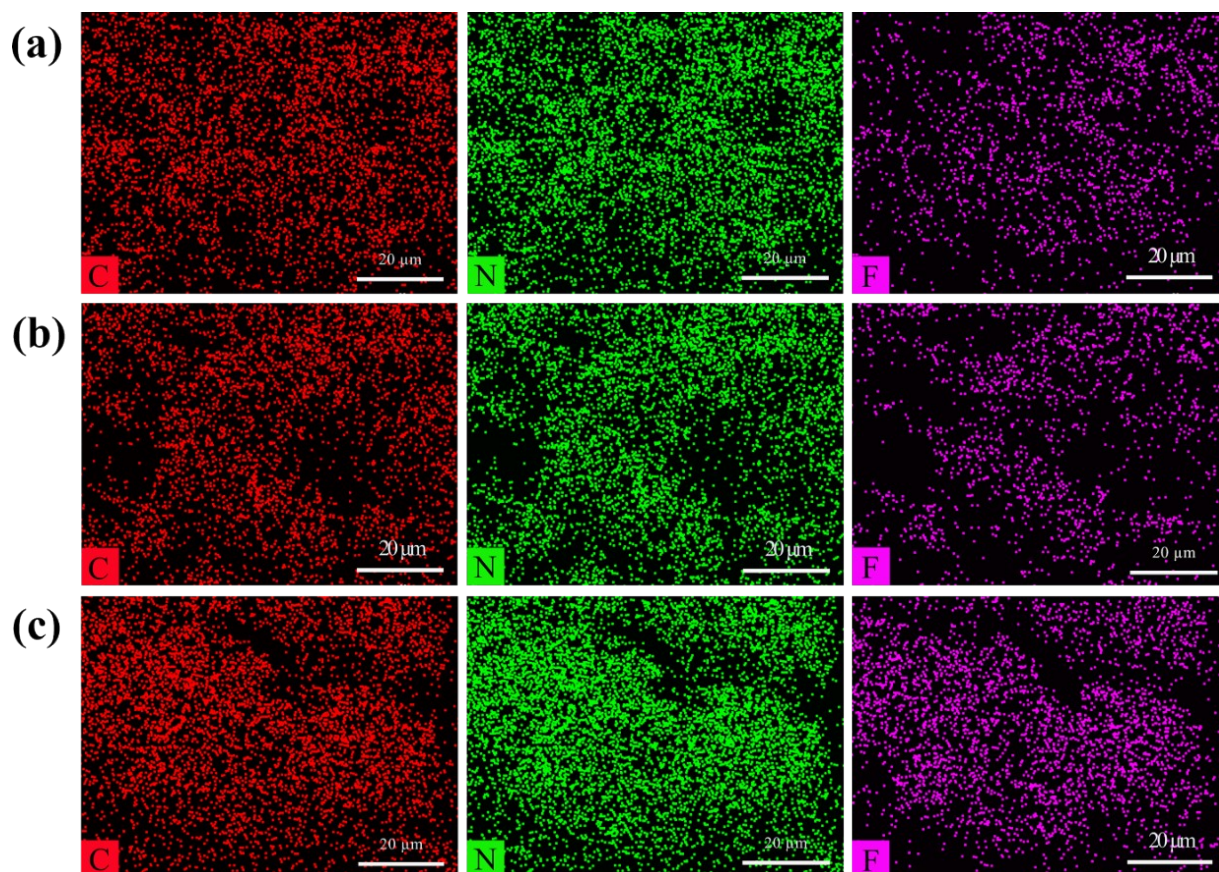

**Fig. S8.** SEM-EDX of (a) COF-TA<sub>0.33</sub>TF<sub>0.67</sub>, (b) COF-TA<sub>0.25</sub>TF<sub>0.75</sub> and (c) COF-TF.

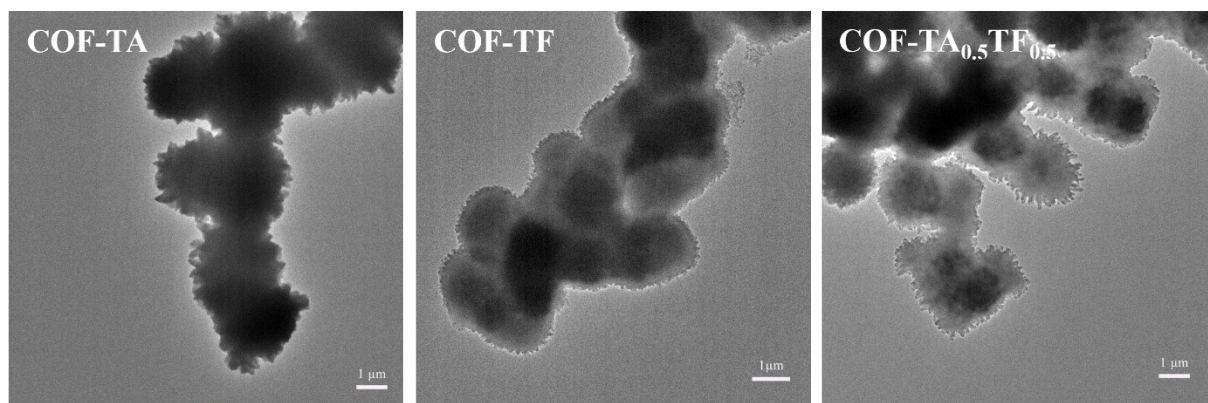

**Fig. S9.** TEM images of COF-TA, COF-TF and COF-TA<sub>0.5</sub>TF<sub>0.5</sub>.

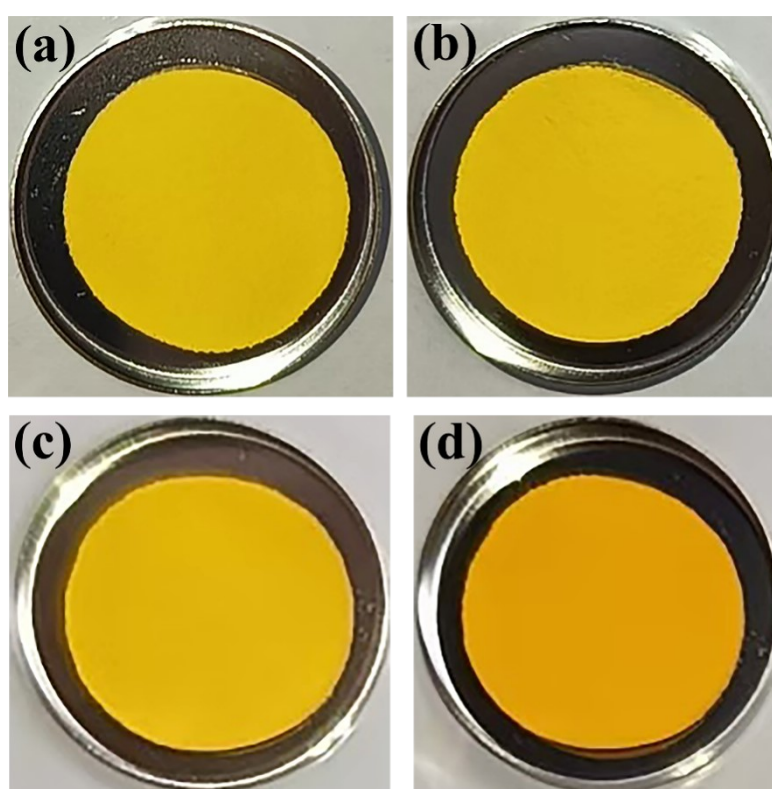

**Fig. S10.** Photographs of the COF-TA<sub>0.5</sub>TF<sub>0.5</sub> electrolyte membrane after being stored in an electric blast drying oven for 1 h at different temperatures: (a) 60 °C, (b) 100 °C, (c) 140 °C and (d) 180 °C.

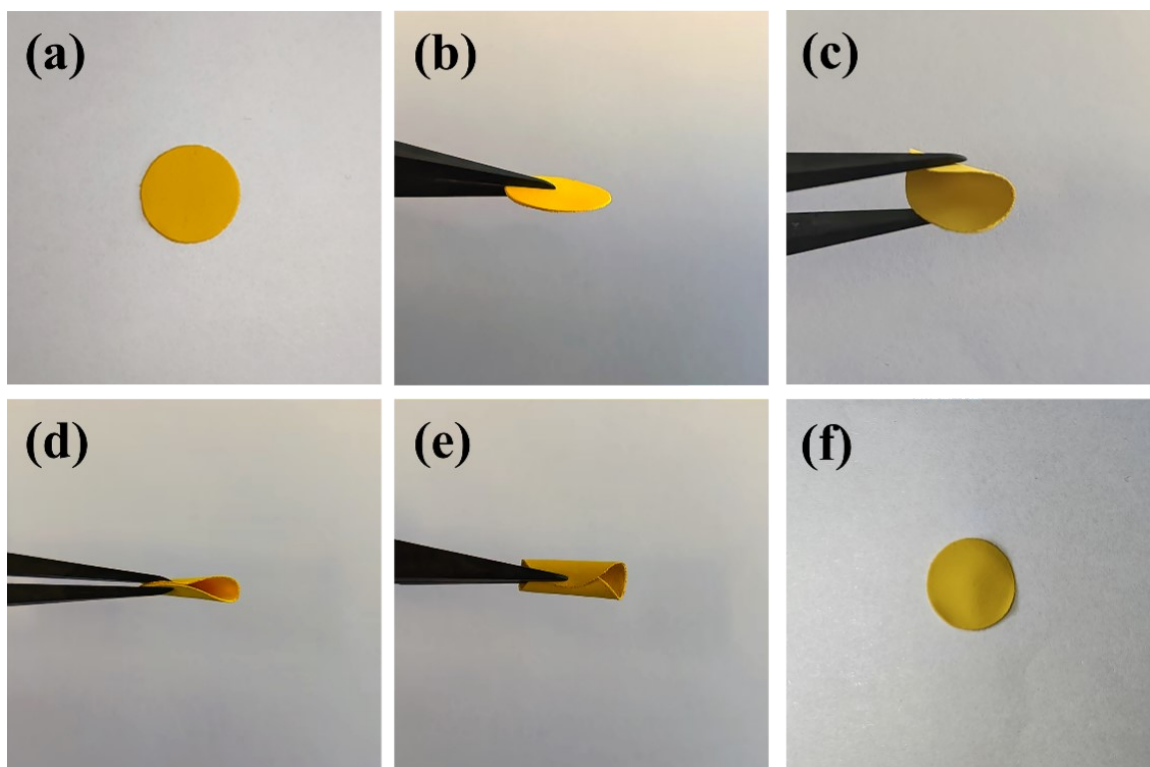

**Fig. S11.** Optical photo of COF-TA<sub>0.5</sub>TF<sub>0.5</sub> quasi-solid-state electrolyte membrane.

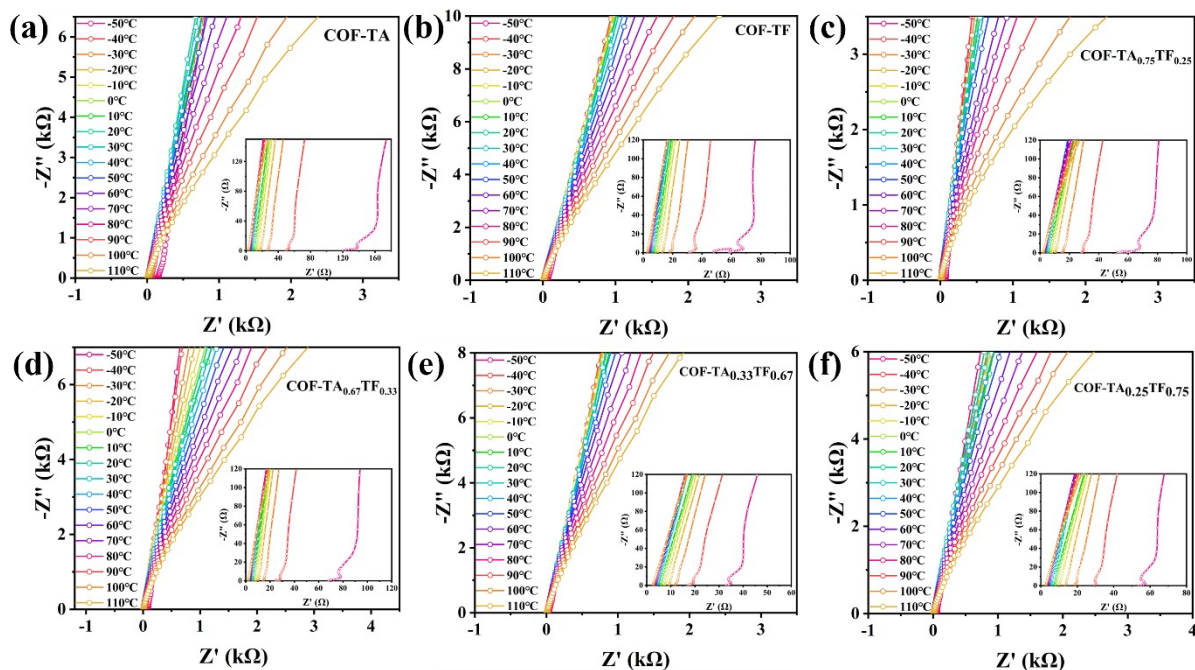

**Fig. S12.** Typical Nyquist plots of the ss|QSSEs|ss cell at various temperatures from  $-50\text{ }^{\circ}\text{C}$  to  $110\text{ }^{\circ}\text{C}$  (the internal is the magnified high frequency area) of (a) COF-TA, (b) COF-TF, (c) COF-TA<sub>0.75</sub>TF<sub>0.25</sub>, (d) COF-TA<sub>0.67</sub>TF<sub>0.33</sub>, (e) COF-TA<sub>0.33</sub>TF<sub>0.67</sub> and (f) COF-TA<sub>0.25</sub>TF<sub>0.75</sub>.

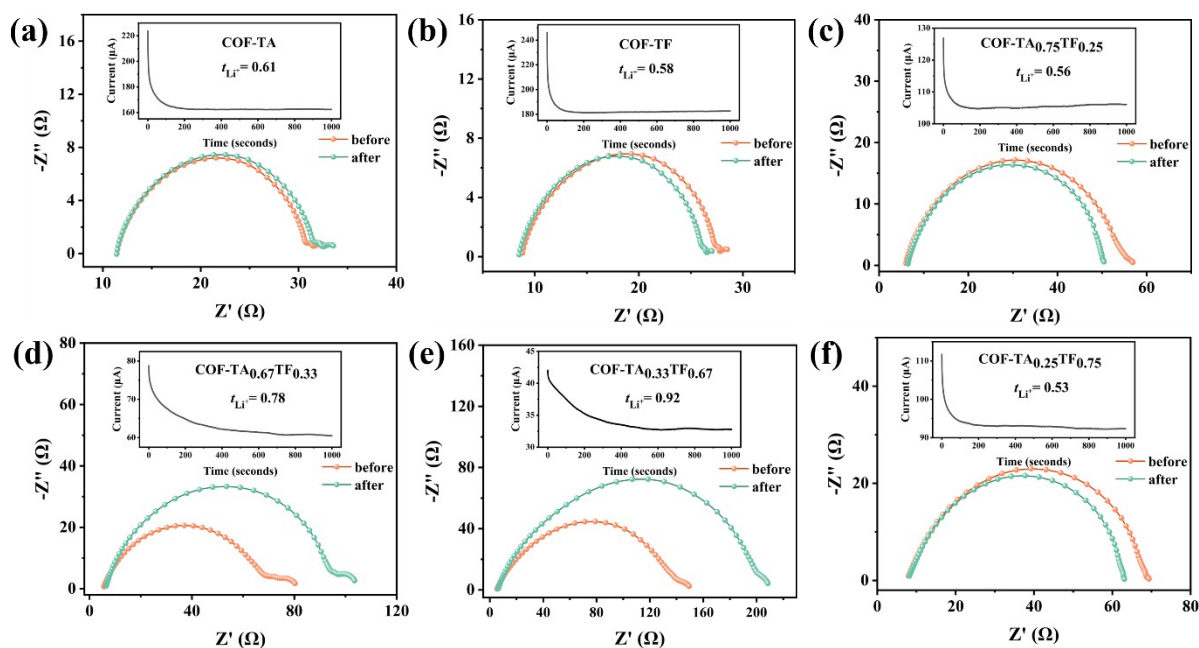

**Fig. S13.** Chronoamperometric curves and EIS curves of (a) COF-TA, (b) COF-TF, (c) COF-TA<sub>0.75</sub>TF<sub>0.25</sub>, (d) COF-TA<sub>0.67</sub>TF<sub>0.33</sub>, (e) COF-TA<sub>0.33</sub>TF<sub>0.67</sub> and (f) COF-TA<sub>0.25</sub>TF<sub>0.75</sub> electrolyte before and after polarization.

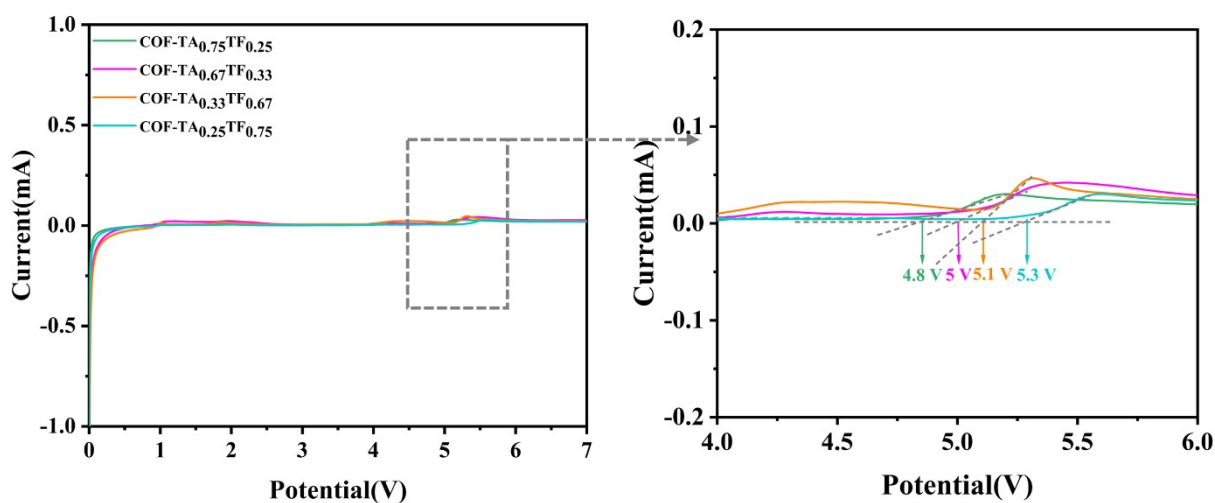

**Fig. S14.** The LSV curves of COF-TA<sub>0.75</sub>TF<sub>0.25</sub>, COF-TA<sub>0.67</sub>TF<sub>0.33</sub>, COF-TA<sub>0.33</sub>TF<sub>0.67</sub> and COF-TA<sub>0.25</sub>TF<sub>0.75</sub> electrolyte at room temperature.

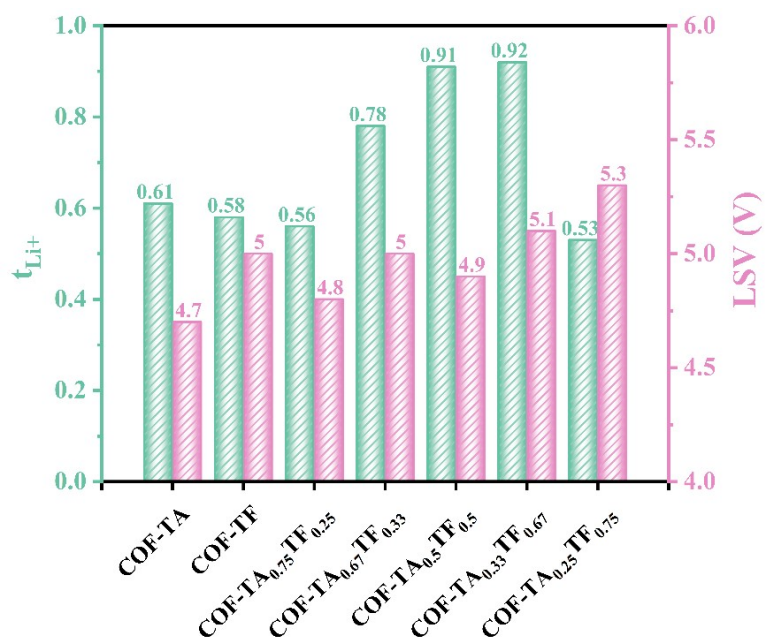

**Fig. S15.** The comprehensive  $t_{Li^+}$  and LSV comparison of COF-TA<sub>a</sub>TF<sub>b</sub> (a+b = 1, a = 0.75, 0.67, 0.5, 0.33, 0.25) QSSE.

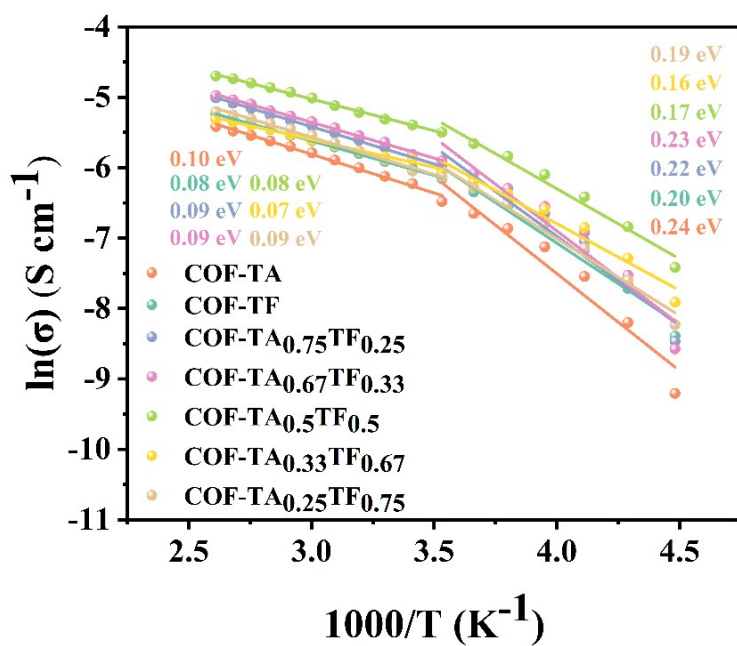

**Fig. S16.** Arrhenius plots of different QSSEs.

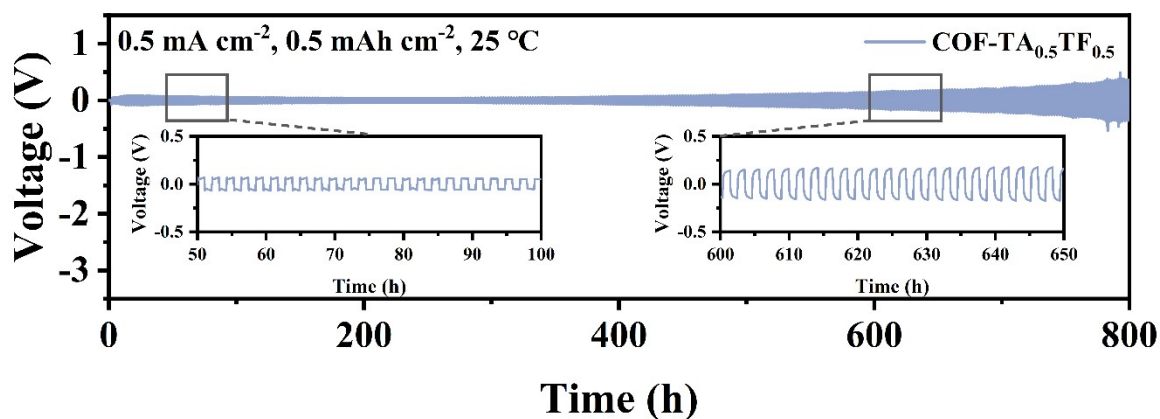

**Fig. S17.** Voltage profiles of the Li|COF-TA<sub>0.5</sub>TF<sub>0.5</sub>|Li symmetric cells with a current density of 0.5 mA cm<sup>-2</sup> at room temperature.

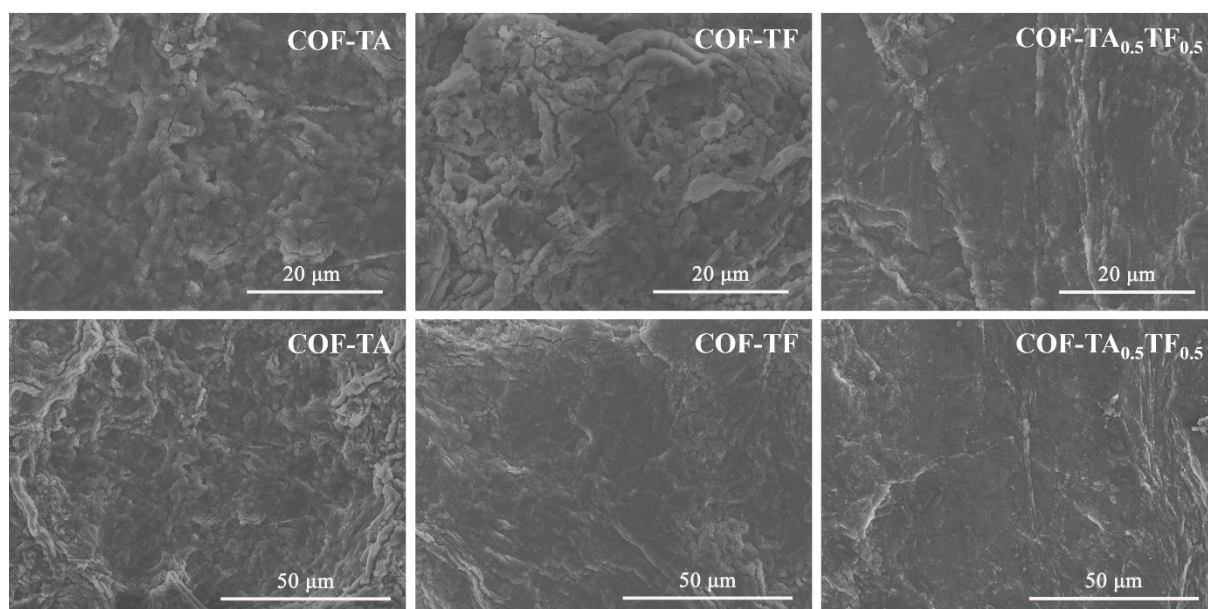

**Fig. S18.** SEM images of Li foil from Li symmetric cells with COF-TA, COF-TF and COF-TA<sub>0.5</sub>TF<sub>0.5</sub> after the lithium plating/stripping at the current density of 0.1 mA cm<sup>-2</sup> and the capacity of 0.1 mAh cm<sup>-2</sup>, respectively.

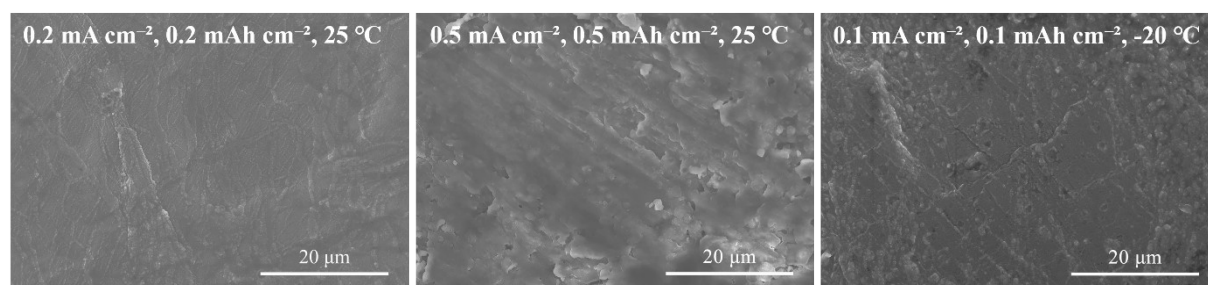

**Fig. S19.** SEM images of Li foil from Li symmetric cells with COF-TA<sub>0.5</sub>TF<sub>0.5</sub> after the lithium plating/stripping at varying current densities, the capacities and temperatures.

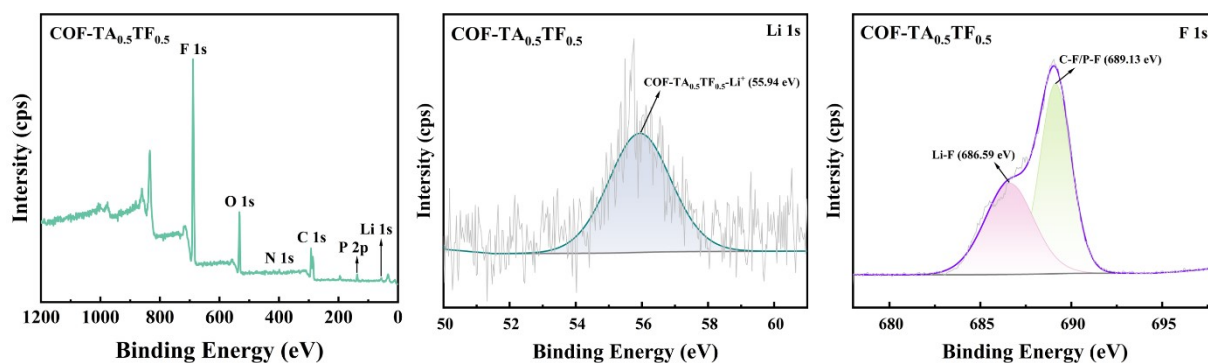

**Fig. S20.** XPS survey spectrum of COF-TA<sub>0.5</sub>TF<sub>0.5</sub>; the XPS fitting plot of COF-TA<sub>0.5</sub>TF<sub>0.5</sub> after the lithium plating/stripping at the current density of 0.2 mA cm<sup>-2</sup> and the capacity of 0.2 mAh cm<sup>-2</sup> for Li 1s and F 1s, respectively.

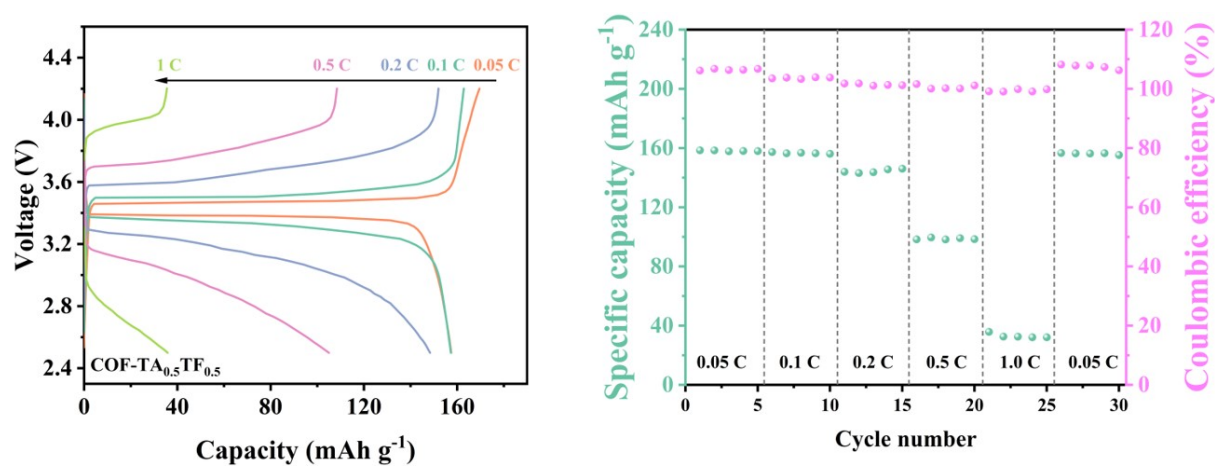

**Fig. S21.** Charge and discharge voltage profiles of COF-TA<sub>0.5</sub>TF<sub>0.5</sub> at different rates; Rate performance of QSSE with COF-TA<sub>0.5</sub>TF<sub>0.5</sub>.

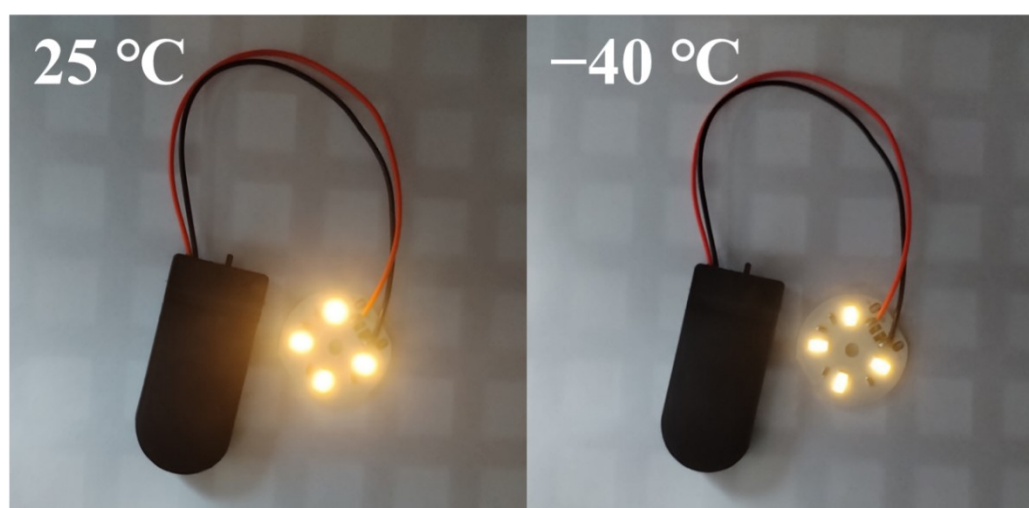

**Fig. S22.** Photographs showing the bulb being lit by LFP|COF-TA<sub>0.5</sub>TF<sub>0.5</sub>|Li at room temperature and -40 °C, respectively.

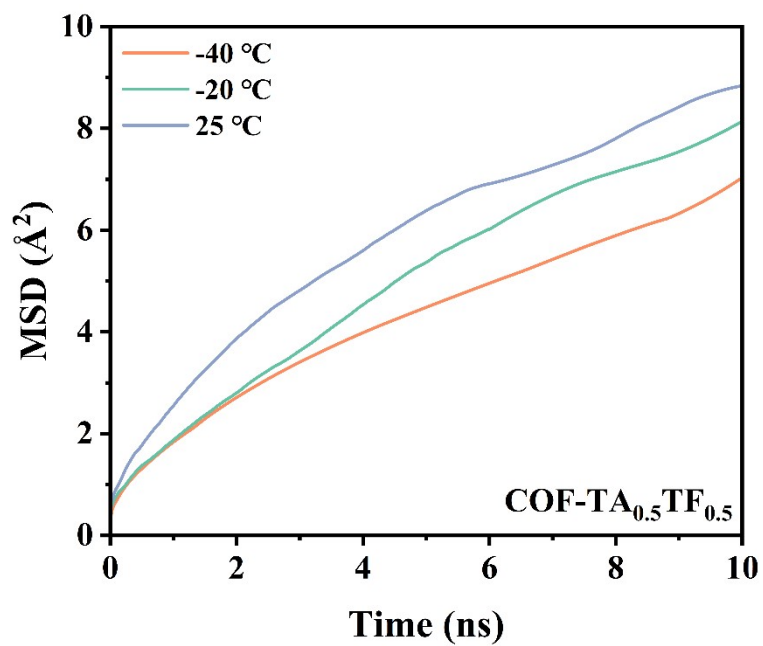

**Fig. S23.** Calculated mean square displacement (MSD) of  $\text{Li}^+$  in electrolytes as a function of the simulation time.

**Table S1.** ICP-OES results of COF-TA, COF-TA<sub>0.5</sub>TF<sub>0.5</sub> and COF-TF.

| Samples                                 | Li/wt.% | Li/mg | LiPF <sub>6</sub> /mg |
|-----------------------------------------|---------|-------|-----------------------|
| COF-TA                                  | 2.01    | 0.80  | 17.61                 |
| COF-TA <sub>0.5</sub> TF <sub>0.5</sub> | 2.26    | 0.90  | 19.80                 |
| COF-TF                                  | 2.05    | 0.82  | 17.93                 |

**Table S2.** The ionic conductivity summary of COF-TA, COF-TF, COF-TA<sub>0.75</sub>TF<sub>0.25</sub>, COF-TA<sub>0.67</sub>TF<sub>0.33</sub>, COF-TA<sub>0.5</sub>TF<sub>0.5</sub>, COF-TA<sub>0.33</sub>TF<sub>0.67</sub>, COF-TA<sub>0.25</sub>TF<sub>0.75</sub> at different temperatures.

| Temperature | $\sigma$ (mS cm <sup>-1</sup> ) |        |                                           |                                           |                                         |                                           |                                           |
|-------------|---------------------------------|--------|-------------------------------------------|-------------------------------------------|-----------------------------------------|-------------------------------------------|-------------------------------------------|
|             | COF-TA                          | COF-TF | COF-TA <sub>0.75</sub> TF <sub>0.25</sub> | COF-TA <sub>0.67</sub> TF <sub>0.33</sub> | COF-TA <sub>0.5</sub> TF <sub>0.5</sub> | COF-TA <sub>0.33</sub> TF <sub>0.67</sub> | COF-TA <sub>0.25</sub> TF <sub>0.75</sub> |
| -50 °C      | 0.1                             | 0.227  | 0.211                                     | 0.189                                     | 0.601                                   | 0.367                                     | 0.267                                     |
| -40 °C      | 0.275                           | 0.446  | 0.466                                     | 0.539                                     | 1.07                                    | 0.686                                     | 0.502                                     |
| -30 °C      | 0.529                           | 0.779  | 0.872                                     | 0.991                                     | 1.64                                    | 1.06                                      | 0.793                                     |
| -20 °C      | 0.805                           | 1.11   | 1.30                                      | 1.43                                      | 2.25                                    | 1.38                                      | 1.11                                      |
| -10 °C      | 1.05                            | 1.44   | 1.68                                      | 1.85                                      | 2.92                                    | 1.71                                      | 1.49                                      |
| 0 °C        | 1.30                            | 1.76   | 2.07                                      | 2.28                                      | 3.49                                    | 2.05                                      | 1.86                                      |
| 10 °C       | 1.54                            | 2.12   | 2.50                                      | 2.74                                      | 4.10                                    | 2.37                                      | 2.17                                      |
| 20 °C       | 1.98                            | 2.43   | 2.80                                      | 2.99                                      | 4.55                                    | 2.82                                      | 2.36                                      |
| 30 °C       | 2.20                            | 2.71   | 3.30                                      | 3.56                                      | 4.93                                    | 2.90                                      | 2.76                                      |
| 40 °C       | 2.47                            | 3.03   | 3.65                                      | 3.92                                      | 5.44                                    | 3.11                                      | 3.14                                      |
| 50 °C       | 2.76                            | 3.33   | 4.06                                      | 4.36                                      | 5.98                                    | 3.39                                      | 3.53                                      |

|        |      |      |      |      |      |      |      |
|--------|------|------|------|------|------|------|------|
| 60 °C  | 3.06 | 3.63 | 4.48 | 4.77 | 6.67 | 3.65 | 3.94 |
| 70 °C  | 3.35 | 3.92 | 4.85 | 5.16 | 7.25 | 3.97 | 4.32 |
| 80 °C  | 3.62 | 4.27 | 5.23 | 5.56 | 7.73 | 4.29 | 4.65 |
| 90 °C  | 3.92 | 4.60 | 5.75 | 6.12 | 8.25 | 4.54 | 4.97 |
| 100 °C | 4.17 | 4.94 | 6.20 | 6.50 | 8.76 | 4.77 | 5.24 |
| 110 °C | 4.45 | 5.31 | 6.68 | 6.90 | 9.11 | 4.95 | 5.51 |

**Table S3.** The Li<sup>+</sup> conductivity comparison between COF-TA<sub>0.5</sub>TF<sub>0.5</sub> and reported work previously in wide temperature range.

| NO. | Materials                     | $\sigma$ (mS cm <sup>-1</sup> ) | $t_{\text{Li}^+}$ | temperature range (°C) | $E_a$ (eV)      | Reference |
|-----|-------------------------------|---------------------------------|-------------------|------------------------|-----------------|-----------|
| 1   | LiBF <sub>4</sub> /PC@PBI-COF | 1.87 (30 °C)<br>3.94 (85 °C)    | 0.58              | 30-85                  | 0.18 (30-85 °C) | 1         |
| 2   | G <sub>4</sub> Li@COF         | 0.165 (25 °C)                   | 0.80              | 20-80                  | 0.35 (20-80 °C) | 2         |
| 3   | CF <sub>3</sub> -COF@PVDF-HFP | 1.21 (25 °C)                    | 0.77              | -                      | -               | 3         |
| 4   | 3D-SpCOF-OH                   | 1.3 (25 °C)                     | 0.64              | 25-80                  | 0.03 (VTF)      | 4         |
| 5   | TpDa-Li COF                   | 0.925 (25 °C)                   | 0.89              | 25-85                  | 0.20 (25-85 °C) | 5         |
| 6   | COF <sub>ds</sub>             | 0.101 (25 °C)                   | 0.91              | 30-80                  | 0.14 (30-80 °C) | 6         |
| 7   | PEO-Li <sup>+</sup> @N-COF    | 0.24 (60 °C)                    | 0.76 (60 °C)      | 40-70                  | 0.45 (40-70 °C) | 7         |

|    |                              |                                                   |      |        |                  |    |
|----|------------------------------|---------------------------------------------------|------|--------|------------------|----|
| 8  | dCOF-ImTFSI-<br>60@Li        | 0.0974 (30 °C)<br>7.05 (150 °C)                   | 0.72 | 30-150 | 0.28 (30-150 °C) | 8  |
| 9  | LiOOC-COF3                   | 0.0136 (30 °C)<br>0.11 (80 °C)                    | 0.91 | 30-80  | 0.17 (30-80 °C)  | 9  |
| 10 | FPI-COF                      | 0.33 (25 °C)                                      | 0.82 | 25-70  | 0.14 (25-70 °C)  | 10 |
| 11 | COF-MCMC                     | 0.49 (30 °C)                                      | 0.71 | -20-60 | 0.31 (-20-60 °C) | 11 |
| 12 | Li <sup>+</sup> -PEG@NUST-23 | 0.0710 (0 °C)<br>1.36 (80 °C)                     | -    | -      | -                | 12 |
| 13 | COF-SS-Li                    | 0.0963 (20 °C)<br>0.128 (40 °C)<br>0.552 (100 °C) | 0.53 | 20-100 | 0.24 (20-100 °C) | 13 |
| 14 | Li <sup>+</sup> @Crown-COF   | 3.5 (30 °C)<br>5.6 (60 °C)<br>8.5 (80 °C)         | 0.60 | 30-80  | 0.13 (30-80 °C)  | 14 |
| 15 | CSQ-COF-2                    | 0.727 (80 °C)                                     | 0.83 | 30-80  | 0.12 (30-80 °C)  | 15 |
| 16 | ETPTA-COF-S                  | 1.29 (20 °C)                                      | 0.83 | 20-60  | 0.21 (20-60 °C)  | 16 |

|    |                                         |                                                                     |                                                                     |                |                                                    |                  |
|----|-----------------------------------------|---------------------------------------------------------------------|---------------------------------------------------------------------|----------------|----------------------------------------------------|------------------|
| 17 | LITFSI@EO-BIm-iCOF                      | 0.108 (25 °C)                                                       | 0.69                                                                | 25-85          | 0.19 (25-85 °C)                                    | 17               |
| 18 | PEO-TB-COF                              | 0.889 (25 °C)                                                       | 0.80                                                                | 25-85          | 0.185 (25-85 °C)                                   | 18               |
| 19 | COF-TA <sub>0.5</sub> TF <sub>0.5</sub> | <b>1.07 (-40 °C)</b><br><b>4.75 (25 °C)</b><br><b>9.11 (110 °C)</b> | <b>0.87 (-40 °C)</b><br><b>0.79 (-20 °C)</b><br><b>0.91 (25 °C)</b> | <b>-50-110</b> | <b>0.17 (-50-10 °C)</b><br><b>0.08 (10-110 °C)</b> | <b>This work</b> |

**Table S4.** The cycling performances comparison between COF-TA<sub>0.5</sub>TF<sub>0.5</sub> and other similar COF-based electrolytes reported previously.

| NO. | Materials                               | System                  | Cycle rate | Temperature (°C) | Coulombic efficiency                                   | Reference        |
|-----|-----------------------------------------|-------------------------|------------|------------------|--------------------------------------------------------|------------------|
| 1   | Li <sup>+</sup> -PEG@NUST-23            | LiFePO <sub>4</sub> /Li | 0.1 C      | 10               | 97.82 (80 cycles)                                      | 12               |
| 2   | BtCOF <sub>2%</sub> -SPE                | LiFePO <sub>4</sub> /Li | 0.1 C      | 25               | 86.6 (200 cycles)                                      | 19               |
| 3   | Dha-COF <sub>im</sub> -IL               | LiFePO <sub>4</sub> /Li | 0.1 C      | 25               | 90 (80 cycles)                                         | 20               |
| 4   | COF-ECJTU1-60-SO <sub>3</sub> Li        | LiFePO <sub>4</sub> /Li | 0.2 C      | 30               | 99.1 (40 cycles)                                       | 21               |
| 5   | COF-TA <sub>0.5</sub> TF <sub>0.5</sub> | LiFePO <sub>4</sub> /Li | 0.1 C      | 25<br>-20        | <b>99.36 (130 cycles)</b><br><b>99.80 (100 cycles)</b> | <b>This work</b> |

## References

1. H. Zhang, Y.-R Kong, J. Zhang, X. Y. Ren and X. M. Ren, *J. Mater. Chem. C* 2023, **11**, 14336.
2. C. Song, Y. Zhao, Y. W, D. Yan, Y. Cai, Y. Zhang, W. Luo, K. Awaga and Y. Wang, *Energy Storage Mater.* 2025, **80**, 104424.
3. G. Feng, Q. Ma, D. Luo, T. Yang, Y. Nie, Z. Zheng, L. Yang, S. Li, Q. Li, M. L. Jin, X. Wang and Z. Chen, *Angew. Chem. Int. Ed.* 2025, **64**, e202413306.
4. S. Wang, X. Li, T. Cheng, Y. Liu, Q. Li, M. Bai, X. Liu, H. Geng, W.-Y. Lai and W. Huang, *J. Mater. Chem. A* 2022, **10**, 8761.
5. C. Wang, P. Shi, H. Zhang, Y. Zhang, Y. Gao, *Int. J. Hydrogen Energy* 2024, **73**, 443.
6. R. H. Choi, A. Gurumoorthi, S. Bae, C. Y. Son and H. R. Byon, *Adv. Energy Mater.* 2025, e04143.
7. D. Shen, W. Liang, X. Wang, L. Yue, B. Wang, Y. Zhou, Y. Yu and Y. Li, *Energy Storage Mater.* 2024, **72**, 103709.
8. Z. Li, Z. W. Liu, Z. Li, T. X. Wang, F. Zhao, X. Ding, W. Feng and B. H. Han, *Adv. Funct. Mater.* 2020, **30**, 1909267.
9. G. Zhao, Z. Mei, L. Duan, Q. An, Y. Yang, C. Zhang, X. Tan and H. Guo, *Carbon Energy.* 2023, **5**, e248.
10. D.-H. Guan, X.-X. Wang, L. Li, G.-N. Chen, G.-Y. Qiao and J.-J. Xu, *J. Am. Chem. Soc.* 2025, **147**, 38078.
11. W. Gong , Y. Ouyang, S. Guo, Y. Xiao, Q. Zeng, D. Li, Y. Xie, Q. Zhang and S. Huang, *Angew. Chem. Int. Ed.* 2023, **62**, e202302505.
12. Y. Xuan, Y. Wang, B. He, S. Bian, J. Liu, B. Xu and G. Zhang, *Chem. Mater.* 2022, **34**, 9104.
13. J. Zhang, D. Luo, H. Xiao, H. Zhao, B. Ding, H. Dou and X. Zhang, *ACS Appl. Mater. Interfaces* 2023, **15**, 34704.
14. M. Gu, J. Wu, C. Li, Z. Zhang, Y. Wu, X. Cheng, R. Li, Y. Tian, K.-T. Bang, R. Wang, S. Suleman, Y. Yuan, J. Huang, D.-M. Shin, Z.-L. Xu, Y. Wang and Y. Kim, *Adv. Mater.* 2025, e11473.
15. Y. Xue, Q. Lin, X. Sun, D. Li, Y. Fu, Z. Li, Y. Shi, C. Luo, X. Gui and K. Xu, *Small* 2025, **21**, 2501988.
16. X. Zhuang, Y. Hui, Y. Feng, J. Chen, J. Chen and Y. Wang, *Sci China Chem*, 2025, **68**, 1533.
17. J. Song, L. Lin, F. Cui, H.-G. Wang, Y. Tian and G. Zhu, *Chem. Sci.* 2024, **15**, 11480.

- 18 Y. Zhang, C. Shan, Z. Chen, S. Wang, C. Wei, Y. Tian, X. Jin, Y. Zhao, X. Liu, Y. Wang and W. Huang, *Small* 2025, **21**, 2502407.
19. X. Tan, Y. Tong, J. Yang, X. Du, A. Yang, A. Zhang and Q. Xu, *Polym. Chem.* 2025, **15**, 454-464.
20. X. Tan, J. Zhong, Y. Tong, L. Guo, Y. Xie and J. Zhao, *Polymer.* 2025, **317**, 127911.
21. S. Mi, Y. Geng, Y. Wang, C. Wang, Z. Yang, F. Zhao and Z. Li, *Small* 2025, **21**, e07272.
